# Supplementary material
Source: Springer Nature journal article supplement (https://www.springermedizin.de/resource/supplementary/12885_2014_4558_MOESM5_ESM.pdf/9466654)

**a**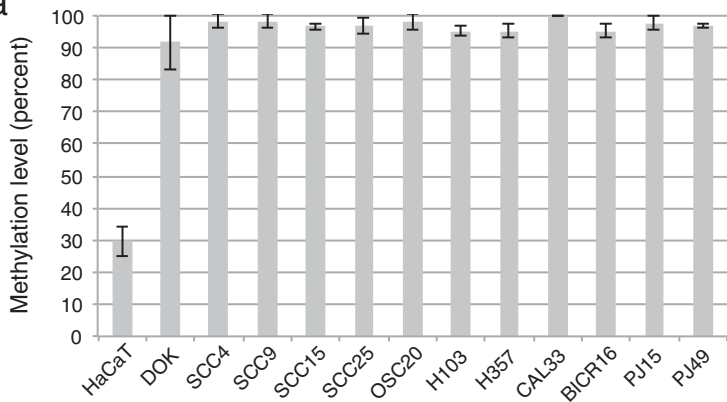**b**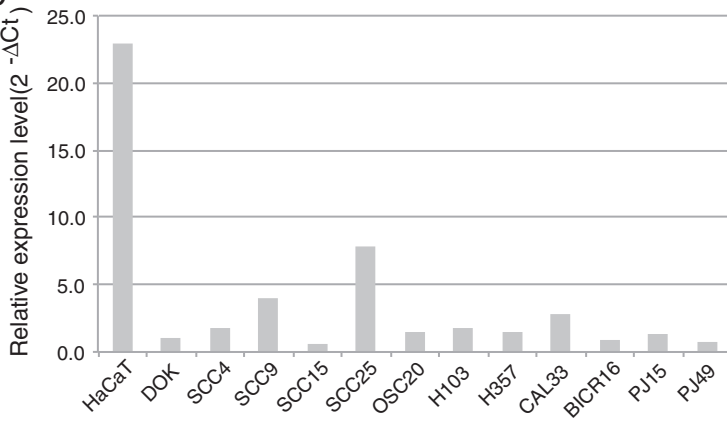

Supplement: MOESM5 [file 9466654]
